# Supplementary material for: A phase II clinical study on the efficacy and predictive biomarker of pegylated recombinant arginase on hepatocellular carcinoma
Source: PubMed Central journal article supplement (PMC8426309; doi:10.1007/s10637-021-01111-8), 2021-04-15
Supplement: 10637_2021_1111_MOESM1_ESM.pdf [file 10637_2021_1111_MOESM1_ESM.pdf]

**Supplementary Table 1. Incidence and severity of adverse events**

|                                                             | <b>All Grade</b>  | <b>Grade 1</b>   | <b>Grade 2</b>   | <b>Grade 3</b>  | <b>Grade 4</b> |
|-------------------------------------------------------------|-------------------|------------------|------------------|-----------------|----------------|
| <b>Patients with AE(s)</b>                                  | <b>27 (100.0)</b> | <b>26 (96.3)</b> | <b>19 (70.4)</b> | <b>8 (29.6)</b> | <b>1 (3.7)</b> |
| <b>Blood and lymphatic system disorders</b>                 | <b>2 (7.4)</b>    | <b>0</b>         | <b>0</b>         | <b>2 (7.4)</b>  | <b>0</b>       |
| Anaemia                                                     | 2 (7.4)           | 0                | 0                | 2 (7.4)         | 0              |
| <b>Cardiac disorders</b>                                    | <b>2 (7.4)</b>    | <b>1 (3.7)</b>   | <b>1 (3.7)</b>   | <b>0</b>        | <b>0</b>       |
| Palpitations                                                | 1 (3.7)           | 1 (3.7)          | 0                | 0               | 0              |
| Sinus tachycardia                                           | 1 (3.7)           | 0                | 1 (3.7)          | 0               | 0              |
| <b>Endocrine disorders</b>                                  | <b>1 (3.7)</b>    | <b>0</b>         | <b>1 (3.7)</b>   | <b>0</b>        | <b>0</b>       |
| Hypothyroidism                                              | 1 (3.7)           | 0                | 1 (3.7)          | 0               | 0              |
| <b>Gastrointestinal disorders</b>                           | <b>16 (59.3)</b>  | <b>12 (44.4)</b> | <b>8 (29.6)</b>  | <b>2 (7.4)</b>  | <b>0</b>       |
| Abdominal distension                                        | 1 (3.7)           | 0                | 1 (3.7)          | 0               | 0              |
| Abdominal pain                                              | 3 (11.1)          | 0                | 3 (11.1)         | 0               | 0              |
| Ascites                                                     | 3 (11.1)          | 1 (3.7)          | 2 (7.4)          | 0               | 0              |
| Constipation                                                | 10 (37.0)         | 7 (25.9)         | 3 (11.1)         | 0               | 0              |
| Diarrhoea                                                   | 3 (11.1)          | 3 (11.1)         | 0                | 0               | 0              |
| Duodenal haemorrhage                                        | 1 (3.7)           | 0                | 0                | 1 (3.7)         | 0              |
| Dyspepsia                                                   | 5 (18.5)          | 3 (11.1)         | 2 (7.4)          | 0               | 0              |
| Oesophageal ulcer                                           | 1 (3.7)           | 0                | 1 (3.7)          | 0               | 0              |
| Oesophageal varices haemorrhage                             | 1 (3.7)           | 0                | 0                | 1 (3.7)         | 0              |
| Gastrointestinal disorders – Other, abdominal colic         | 1 (3.7)           | 1 (3.7)          | 0                | 0               | 0              |
| Mucositis oral                                              | 1 (3.7)           | 1 (3.7)          | 0                | 0               | 0              |
| Nausea                                                      | 6 (22.2)          | 3 (11.1)         | 3 (11.1)         | 0               | 0              |
| Vomiting                                                    | 2 (7.4)           | 2 (7.4)          | 0                | 0               | 0              |
| <b>General disorders and administration site conditions</b> | <b>22 (81.5)</b>  | <b>20 (74.1)</b> | <b>8 (29.6)</b>  | <b>0</b>        | <b>0</b>       |
| Oedema limbs                                                | 7 (25.9)          | 7 (25.9)         | 0                | 0               | 0              |
| Fatigue                                                     | 16 (59.3)         | 13 (48.1)        | 5 (18.5)         | 0               | 0              |
| Fever                                                       | 6 (22.2)          | 5 (18.5)         | 2 (7.4)          | 0               | 0              |
| Malaise                                                     | 1 (3.7)           | 1 (3.7)          | 0                | 0               | 0              |
| Non-cardiac chest pain                                      | 1 (3.7)           | 0                | 1 (3.7)          | 0               | 0              |
| <b>Hepatobiliary disorders</b>                              | <b>4 (14.8)</b>   | <b>1 (3.7)</b>   | <b>1 (3.7)</b>   | <b>2 (7.4)</b>  | <b>0</b>       |
| Hepatobiliary disorders – Other, obstructive jaundice       | 2 (7.4)           | 0                | 0                | 2 (7.4)         | 0              |
| Hepatobiliary disorders – Other, tumour rupture             | 1 (3.7)           | 0                | 1 (3.7)          | 0               | 0              |
| Hepatobiliary disorders, Other – hepatomegaly               | 1 (3.7)           | 1 (3.7)          | 0                | 0               | 0              |
| <b>Immune system disorders</b>                              | <b>1 (3.7)</b>    | <b>0</b>         | <b>1 (3.7)</b>   | <b>0</b>        | <b>0</b>       |
| Allergic reaction                                           | 1 (3.7)           | 0                | 1 (3.7)          | 0               | 0              |
| <b>Infections and infestations</b>                          | <b>3 (11.1)</b>   | <b>1 (3.7)</b>   | <b>2 (7.4)</b>   | <b>0</b>        | <b>0</b>       |

|                                                                                                                         |                 |                 |                 |                 |                |
|-------------------------------------------------------------------------------------------------------------------------|-----------------|-----------------|-----------------|-----------------|----------------|
| Infections and infestations –<br>Other, pulmonary tuberculosis                                                          | 1 (3.7)         | 0               | 1 (3.7)         | 0               | 0              |
| Upper respiratory infection                                                                                             | 2 (7.4)         | 1 (3.7)         | 1 (3.7)         | 0               | 0              |
| <b>Injury, poisoning and<br/>procedural complications</b>                                                               | <b>1 (3.7)</b>  | <b>1 (3.7)</b>  | <b>0</b>        | <b>0</b>        | <b>0</b>       |
| Bruising                                                                                                                | 1 (3.7)         | 1 (3.7)         | 0               | 0               | 0              |
| <b>Investigations</b>                                                                                                   | <b>8 (29.6)</b> | <b>4 (14.8)</b> | <b>3 (11.1)</b> | <b>1 (3.7)</b>  | <b>1 (3.7)</b> |
| Alanine aminotransferase<br>increased                                                                                   | 1 (3.7)         | 1 (3.7)         | 0               | 0               | 0              |
| Alkaline phosphatase increased                                                                                          | 1 (3.7)         | 0               | 0               | 1 (3.7)         | 0              |
| Blood bilirubin increased                                                                                               | 2 (7.4)         | 0               | 1 (3.7)         | 1 (3.7)         | 1 (3.7)        |
| Creatinine increased                                                                                                    | 1 (3.7)         | 0               | 0               | 1 (3.7)         | 0              |
| Platelet count decreased                                                                                                | 1 (3.7)         | 1 (3.7)         | 0               | 0               | 0              |
| Weight gain                                                                                                             | 2 (7.4)         | 0               | 2 (7.4)         | 0               | 0              |
| Weight loss                                                                                                             | 2 (7.4)         | 2 (7.4)         | 0               | 0               | 0              |
| <b>Metabolism and nutrition<br/>disorders</b>                                                                           | <b>8 (29.6)</b> | <b>4 (14.8)</b> | <b>6 (22.2)</b> | <b>3 (11.1)</b> | <b>0</b>       |
| Anorexia                                                                                                                | 2 (7.4)         | 1 (3.7)         | 1 (3.7)         | 0               | 0              |
| Hypercalcemia                                                                                                           | 1 (3.7)         | 0               | 1 (3.7)         | 0               | 0              |
| Hyperglycaemia                                                                                                          | 1 (3.7)         | 1 (3.7)         | 0               | 0               | 0              |
| Hyperkalaemia                                                                                                           | 1 (3.7)         | 0               | 1 (3.7)         | 0               | 0              |
| Hypoalbuminemia                                                                                                         | 1 (3.7)         | 0               | 1 (3.7)         | 0               | 0              |
| Hypokalaemia                                                                                                            | 4 (14.8)        | 1 (3.7)         | 3 (11.1)        | 0               | 0              |
| Hyponatremia                                                                                                            | 4 (14.8)        | 1 (3.7)         | 0               | 3 (11.1)        | 0              |
| Hypophosphatemia                                                                                                        | 1 (3.7)         | 0               | 0               | 1 (3.7)         | 0              |
| <b>Musculoskeletal and connective<br/>tissue disorders</b>                                                              | <b>3 (11.1)</b> | <b>0</b>        | <b>3 (11.1)</b> | <b>0</b>        | <b>0</b>       |
| Back pain                                                                                                               | 1 (3.7)         | 0               | 1 (3.7)         | 0               | 0              |
| Musculoskeletal and connective<br>tissue disorder – Other, left<br>shoulder pain                                        | 1 (3.7)         | 0               | 1 (3.7)         | 0               | 0              |
| Pain in extremity                                                                                                       | 1 (3.7)         | 0               | 1 (3.7)         | 0               | 0              |
| <b>Neoplasms benign, malignant<br/>and unspecified (including cysts<br/>and polyps)</b>                                 | <b>1 (3.7)</b>  | <b>1 (3.7)</b>  | <b>0</b>        | <b>0</b>        | <b>0</b>       |
| Neoplasms benign, malignant and<br>unspecified (including cysts and<br>polyps) – Other, Benign prostatic<br>hyperplasia | 1 (3.7)         | 1 (3.7)         | 0               | 0               | 0              |
| <b>Nervous system disorders</b>                                                                                         | <b>3 (11.1)</b> | <b>0</b>        | <b>1 (3.7)</b>  | <b>2 (7.4)</b>  | <b>0</b>       |
| Nervous system disorders –<br>Other, cord compression                                                                   | 2 (7.4)         | 0               | 0               | 2 (7.4)         | 0              |
| Nervous system disorders –<br>Other, sciatica                                                                           | 1 (3.7)         | 0               | 1 (3.7)         | 0               | 0              |
| <b>Psychiatric disorders</b>                                                                                            | <b>5 (18.5)</b> | <b>3 (11.1)</b> | <b>2 (7.4)</b>  | <b>0</b>        | <b>0</b>       |
| Insomnia                                                                                                                | 5 (18.5)        | 3 (11.1)        | 2 (7.4)         | 0               | 0              |

|                                                                      |                  |                  |                 |                |          |
|----------------------------------------------------------------------|------------------|------------------|-----------------|----------------|----------|
| <b>Renal and urinary disorders</b>                                   | <b>4 (14.8)</b>  | <b>3 (11.1)</b>  | <b>2 (7.4)</b>  | <b>0</b>       | <b>0</b> |
| Renal and urinary disorders – Other, dysuria                         | 3 (11.1)         | 3 (11.1)         | 0               | 0              | 0        |
| Urinary retention                                                    | 2 (7.4)          | 0                | 2 (7.4)         | 0              | 0        |
| <b>Respiratory, thoracic and mediastinal disorders</b>               | <b>12 (44.4)</b> | <b>12 (44.4)</b> | <b>4 (14.8)</b> | <b>1 (3.7)</b> | <b>0</b> |
| Cough                                                                | 5 (18.5)         | 5 (18.5)         | 0               | 0              | 0        |
| Dyspnoea                                                             | 3 (11.1)         | 3 (11.1)         | 0               | 0              | 0        |
| Epistaxis                                                            | 1 (3.7)          | 1 (3.7)          | 0               | 0              | 0        |
| Hiccups                                                              | 1 (3.7)          | 0                | 1 (3.7)         | 0              | 0        |
| Pleural effusion                                                     | 2 (7.4)          | 2 (7.4)          | 1 (3.7)         | 0              | 0        |
| Pneumothorax                                                         | 1 (3.7)          | 0                | 1 (3.7)         | 0              | 0        |
| Productive cough                                                     | 5 (18.5)         | 4 (14.8)         | 1 (3.7)         | 0              | 0        |
| Respiratory, thoracic and mediastinal disorders – Other, haemoptysis | 1 (3.7)          | 0                | 0               | 1 (3.7)        | 0        |
| Respiratory, thoracic and mediastinal disorders – Other, runny nose  | 1 (3.7)          | 1 (3.7)          | 0               | 0              | 0        |
| Sore throat                                                          | 3 (11.1)         | 2 (7.4)          | 1 (3.7)         | 0              | 0        |
| <b>Skin and subcutaneous tissue disorders</b>                        | <b>5 (18.5)</b>  | <b>5 (18.5)</b>  | <b>0</b>        | <b>0</b>       | <b>0</b> |
| Alopecia                                                             | 2 (7.4)          | 2 (7.4)          | 0               | 0              | 0        |
| Dry skin                                                             | 1 (3.7)          | 1 (3.7)          | 0               | 0              | 0        |
| Rash maculo-papular                                                  | 3 (11.1)         | 3 (11.1)         | 0               | 0              | 0        |
| Skin and subcutaneous tissue disorders – Other, bed sore             | 1 (3.7)          | 1 (3.7)          | 0               | 0              | 0        |
| <b>Vascular disorders</b>                                            | <b>1 (3.7)</b>   | <b>1 (3.7)</b>   | <b>0</b>        | <b>1 (3.7)</b> | <b>0</b> |
| Hematoma                                                             | 1 (3.7)          | 1 (3.7)          | 0               | 0              | 0        |
| Thromboembolic event                                                 | 1 (3.7)          | 0                | 0               | 1 (3.7)        | 0        |

(Abbreviations: AE, adverse events)

**Supplementary Table 2. Quality of life (EORTC QLQ-C30) at the baseline and end of treatment visit**

| <b>Global health status</b>  |  |                       |
|------------------------------|--|-----------------------|
| Baseline                     |  |                       |
| N                            |  | 23                    |
| Mean (SD)                    |  | 60.87 (20.480)        |
| Median (Q1, Q3)              |  | 58.33 (50.00, 66.67)  |
| Minimum, Maximum             |  | 33.33, 100.00         |
| EoT Visit                    |  |                       |
| N                            |  | 22                    |
| Mean (SD)                    |  | 54.55 (25.938)        |
| Median (Q1, Q3)              |  | 58.33 (33.33, 66.67)  |
| Minimum, Maximum             |  | 0.00, 100.00          |
| <b>Physical functioning</b>  |  |                       |
| Baseline                     |  |                       |
| N                            |  | 23                    |
| Mean (SD)                    |  | 75.36 (15.100)        |
| Median (Q1, Q3)              |  | 80.00 (60.00, 86.67)  |
| Minimum, Maximum             |  | 46.67, 100.00         |
| EoT Visit                    |  |                       |
| N                            |  | 22                    |
| Mean (SD)                    |  | 60.23 (29.922)        |
| Median (Q1, Q3)              |  | 70.00 (33.33, 86.67)  |
| Minimum, Maximum             |  | 0.00, 100.00          |
| <b>Role functioning</b>      |  |                       |
| Baseline                     |  |                       |
| N                            |  | 23                    |
| Mean (SD)                    |  | 71.01 (28.523)        |
| Median (Q1, Q3)              |  | 66.67 (50.00, 100.00) |
| Minimum, Maximum             |  | 0.00, 100.00          |
| EoT Visit                    |  |                       |
| N                            |  | 22                    |
| Mean (SD)                    |  | 65.15 (38.459)        |
| Median (Q1, Q3)              |  | 66.67 (50.00, 91.67)  |
| Minimum, Maximum             |  | 0.00, 100.00          |
| <b>Emotional functioning</b> |  |                       |
| Baseline                     |  |                       |
| N                            |  | 23                    |
| Mean (SD)                    |  | 77.17 (20.752)        |
| Median (Q1, Q3)              |  | 66.67 (66.67, 100.00) |
| Minimum, Maximum             |  | 41.67, 100.00         |
| EoT Visit                    |  |                       |
| N                            |  | 22                    |
| Mean (SD)                    |  | 72.73 (19.616)        |
| Median (Q1, Q3)              |  | 66.67 (66.67, 91.67)  |
| Minimum, Maximum             |  | 41.67, 100.00         |
| <b>Cognitive functioning</b> |  |                       |
| Baseline                     |  |                       |
| N                            |  | 23                    |
| Mean (SD)                    |  | 82.61 (14.632)        |

|                            |                       |
|----------------------------|-----------------------|
| Median (Q1, Q3)            | 83.33 (66.67, 100.00) |
| Minimum, Maximum           | 66.67, 100.00         |
| <b>EoT Visit</b>           |                       |
| N                          | 22                    |
| Mean (SD)                  | 73.48 (20.993)        |
| Median (Q1, Q3)            | 66.67 (66.67, 100.00) |
| Minimum, Maximum           | 33.33, 100.00         |
| <b>Social Functioning</b>  |                       |
| <b>Baseline</b>            |                       |
| N                          | 23                    |
| Mean (SD)                  | 73.91 (24.009)        |
| Median (Q1, Q3)            | 66.67 (66.67, 100.00) |
| Minimum, Maximum           | 33.33, 100.00         |
| <b>EoT Visit</b>           |                       |
| N                          | 22                    |
| Mean (SD)                  | 68.18 (31.248)        |
| Median (Q1, Q3)            | 66.67 (66.67, 100.00) |
| Minimum, Maximum           | 0.00, 100.00          |
| <b>Fatigue</b>             |                       |
| <b>Baseline</b>            |                       |
| N                          | 23                    |
| Mean (SD)                  | 31.88 (22.549)        |
| Median (Q1, Q3)            | 33.33 (22.22, 33.33)  |
| Minimum, Maximum           | 0.00, 88.89           |
| <b>EoT Visit</b>           |                       |
| N                          | 22                    |
| Mean (SD)                  | 46.46 (30.213)        |
| Median (Q1, Q3)            | 38.89 (22.22, 66.67)  |
| Minimum, Maximum           | 0.00, 100.00          |
| <b>Nausea and vomiting</b> |                       |
| <b>Baseline</b>            |                       |
| N                          | 23                    |
| Mean (SD)                  | 9.42 (15.752)         |
| Median (Q1, Q3)            | 0.00 (0.00, 16.67)    |
| Minimum, Maximum           | 0.00, 50.00           |
| <b>EoT Visit</b>           |                       |
| N                          | 22                    |
| Mean (SD)                  | 17.42 (24.385)        |
| Median (Q1, Q3)            | 0.00 (0.00, 33.33)    |
| Minimum, Maximum           | 0.00, 83.33           |
| <b>Pain</b>                |                       |
| <b>Baseline</b>            |                       |
| N                          | 23                    |
| Mean (SD)                  | 29.71 (24.596)        |
| Median (Q1, Q3)            | 33.33 (0.00, 50.00)   |
| Minimum, Maximum           | 0.00, 66.67           |
| <b>EoT Visit</b>           |                       |
| N                          | 22                    |
| Mean (SD)                  | 39.39 (29.343)        |
| Median (Q1, Q3)            | 33.33 (16.67, 66.67)  |

|                      |                     |
|----------------------|---------------------|
| Minimum, Maximum     | 0.00, 100.00        |
| <b>Dyspnoea</b>      |                     |
| Baseline             |                     |
| N                    | 23                  |
| Mean (SD)            | 24.64 (22.957)      |
| Median (Q1, Q3)      | 33.33 (0.00, 33.33) |
| Minimum, Maximum     | 0.00, 66.67         |
| EoT Visit            |                     |
| N                    | 22                  |
| Mean (SD)            | 36.36 (36.960)      |
| Median (Q1, Q3)      | 33.33 (0.00, 66.67) |
| Minimum, Maximum     | 0.00, 100.00        |
| <b>Insomnia</b>      |                     |
| Baseline             |                     |
| N                    | 23                  |
| Mean (SD)            | 36.23 (30.005)      |
| Median (Q1, Q3)      | 33.33 (0.00, 66.67) |
| Minimum, Maximum     | 0.00, 100.00        |
| EoT Visit            |                     |
| N                    | 22                  |
| Mean (SD)            | 37.88 (33.007)      |
| Median (Q1, Q3)      | 33.33 (0.00, 66.67) |
| Minimum, Maximum     | 0.00, 100.00        |
| <b>Appetite loss</b> |                     |
| Baseline             |                     |
| N                    | 23                  |
| Mean (SD)            | 26.09 (31.713)      |
| Median (Q1, Q3)      | 0.00 (0.00, 66.67)  |
| Minimum, Maximum     | 0.00, 100.00        |
| EoT Visit            |                     |
| N                    | 22                  |
| Mean (SD)            | 43.94 (40.351)      |
| Median (Q1, Q3)      | 33.33 (0.00, 66.67) |
| Minimum, Maximum     | 0.00, 100.00        |
| <b>Constipation</b>  |                     |
| Baseline             |                     |
| N                    | 23                  |
| Mean (SD)            | 11.59 (16.233)      |
| Median (Q1, Q3)      | 0.00 (0.00, 33.33)  |
| Minimum, Maximum     | 0.00, 33.33         |
| EoT Visit            |                     |
| N                    | 22                  |
| Mean (SD)            | 18.18 (28.595)      |
| Median (Q1, Q3)      | 0.00 (0.00, 33.33)  |
| Minimum, Maximum     | 0.00, 100.00        |
| <b>Diarrhoea</b>     |                     |
| Baseline             |                     |
| N                    | 23                  |
| Mean (SD)            | 13.04 (21.879)      |
| Median (Q1, Q3)      | 0.00 (0.00, 33.33)  |

|                               |                  |                      |
|-------------------------------|------------------|----------------------|
|                               | Minimum, Maximum | 0.00, 66.67          |
| <b>EoT Visit</b>              |                  |                      |
|                               | N                | 22                   |
|                               | Mean (SD)        | 12.12 (24.224)       |
|                               | Median (Q1, Q3)  | 0.00 (0.00, 0.00)    |
|                               | Minimum, Maximum | 0.00, 66.67          |
| <b>Financial difficulties</b> |                  |                      |
| <b>Baseline</b>               |                  |                      |
|                               | N                | 23                   |
|                               | Mean (SD)        | 47.83 (31.505)       |
|                               | Median (Q1, Q3)  | 33.33 (33.33, 66.67) |
|                               | Minimum, Maximum | 0.00, 100.00         |
| <b>EoT Visit</b>              |                  |                      |
|                               | N                | 22                   |
|                               | Mean (SD)        | 43.94 (29.790)       |
|                               | Median (Q1, Q3)  | 33.33 (33.33, 66.67) |
|                               | Minimum, Maximum | 0.00, 100.00         |

(Abbreviations: EoT, end of treatment; SD, standard deviation)

**Supplementary Table 3. Quality of life (EORTC QLQ-HCC18) at the baseline and end of treatment visit**

| <b>Fatigue symptom scale</b>  |  |                      |
|-------------------------------|--|----------------------|
| Baseline                      |  |                      |
| N                             |  | 20                   |
| Mean (SD)                     |  | 35.83 (25.265)       |
| Median (Q1, Q3)               |  | 33.33 (11.11, 52.78) |
| Minimum, Maximum              |  | 0.00, 88.89          |
| EoT Visit                     |  |                      |
| N                             |  | 22                   |
| Mean (SD)                     |  | 36.87 (26.201)       |
| Median (Q1, Q3)               |  | 38.89 (11.11, 44.44) |
| Minimum, Maximum              |  | 0.00, 88.89          |
| <b>Body image scale</b>       |  |                      |
| Baseline                      |  |                      |
| N                             |  | 20                   |
| Mean (SD)                     |  | 24.17 (23.863)       |
| Median (Q1, Q3)               |  | 33.33 (0.00, 33.33)  |
| Minimum, Maximum              |  | 0.00, 83.33          |
| EoT Visit                     |  |                      |
| N                             |  | 22                   |
| Mean (SD)                     |  | 28.79 (20.041)       |
| Median (Q1, Q3)               |  | 33.33 (16.67, 33.33) |
| Minimum, Maximum              |  | 0.00, 83.33          |
| <b>Jaundice symptom scale</b> |  |                      |
| Baseline                      |  |                      |
| N                             |  | 20                   |
| Mean (SD)                     |  | 20.00 (21.357)       |
| Median (Q1, Q3)               |  | 16.67 (0.00, 33.33)  |
| Minimum, Maximum              |  | 0.00, 66.67          |
| EoT Visit                     |  |                      |
| N                             |  | 22                   |
| Mean (SD)                     |  | 18.18 (17.750)       |
| Median (Q1, Q3)               |  | 16.67 (0.00, 33.33)  |
| Minimum, Maximum              |  | 0.00, 66.67          |
| <b>Nutrition scale</b>        |  |                      |
| Baseline                      |  |                      |
| N                             |  | 20                   |
| Mean (SD)                     |  | 26.67 (24.086)       |
| Median (Q1, Q3)               |  | 30.00 (0.00, 43.33)  |
| Minimum, Maximum              |  | 0.00, 73.33          |
| EoT Visit                     |  |                      |
| N                             |  | 22                   |
| Mean (SD)                     |  | 33.03 (27.639)       |
| Median (Q1, Q3)               |  | 26.67 (13.33, 53.33) |
| Minimum, Maximum              |  | 0.00, 86.67          |
| <b>Pain scale</b>             |  |                      |
| Baseline                      |  |                      |
| N                             |  | 20                   |
| Mean (SD)                     |  | 24.17 (27.823)       |



|                           |                      |
|---------------------------|----------------------|
| Median (Q1, Q3)           | 16.67 (0.00, 33.33)  |
| Minimum, Maximum          | 0.00, 100.00         |
| <b>EoT Visit</b>          |                      |
| N                         | 22                   |
| Mean (SD)                 | 25.76 (24.520)       |
| Median (Q1, Q3)           | 25.00 (0.00, 33.33)  |
| Minimum, Maximum          | 0.00, 83.33          |
| <b>Fever scale</b>        |                      |
| <b>Baseline</b>           |                      |
| N                         | 20                   |
| Mean (SD)                 | 5.00 (10.949)        |
| Median (Q1, Q3)           | 0.00 (0.00, 0.00)    |
| Minimum, Maximum          | 0.00, 33.33          |
| <b>EoT Visit</b>          |                      |
| N                         | 22                   |
| Mean (SD)                 | 13.64 (20.339)       |
| Median (Q1, Q3)           | 0.00 (0.00, 16.67)   |
| Minimum, Maximum          | 0.00, 66.67          |
| <b>Abdominal swelling</b> |                      |
| <b>Baseline</b>           |                      |
| N                         | 20                   |
| Mean (SD)                 | 16.67 (27.572)       |
| Median (Q1, Q3)           | 0.00 (0.00, 33.33)   |
| Minimum, Maximum          | 0.00, 100.00         |
| <b>EoT Visit</b>          |                      |
| N                         | 22                   |
| Mean (SD)                 | 24.24 (25.577)       |
| Median (Q1, Q3)           | 33.33 (0.00, 33.33)  |
| Minimum, Maximum          | 0.00, 100.00         |
| <b>Sex life</b>           |                      |
| <b>Baseline</b>           |                      |
| N                         | 17                   |
| Mean (SD)                 | 35.29 (36.268)       |
| Median (Q1, Q3)           | 33.33 (0.00, 66.67)  |
| Minimum, Maximum          | 0.00, 100.00         |
| <b>EoT Visit</b>          |                      |
| N                         | 19                   |
| Mean (SD)                 | 43.86 (41.652)       |
| Median (Q1, Q3)           | 33.33 (0.00, 100.00) |
| Minimum, Maximum          | 0.00, 100.00         |

(Abbreviations: EoT, end of treatment; SD, standard deviation)
